# Supplementary material for: Development and application of a supervised pattern recognition algorithm for identification of fuel-specific emissions profiles
Source: Copernicus journal article supplement (doi:10.5194/amt-15-2591-2022), 2022-04-29
Supplement: Supplementary file 1 [file amt-15-2591-2022-supplement.zip]

## S1 FLAME-4 FL12 emission profiles similarity study

This section presents a comparison and analysis of emission profiles using data from the FLAME-4 FL12 campaign, and provides the rationale for the focus on monoterpenoids in the current application of the PR and classification algorithms. The FLAME-4 FL12 data set was chosen for the comparison and analysis because it currently contains a larger number and broader range of compounds for which calibrated mixing ratios are available and EFs have been calculated. In the near future, the FIREX FL16 data set will provide additional opportunities for analysis and application of the PR and classification algorithms. The published FLAME-4 FL 12 data set (Hatch et al. (2015)) includes 458 compounds across six samples (ponderosa pine, black spruce, Indonesian peat, rice straw, wiregrass and giant cutgrass). With only six samples, the statistical requirements of the PR algorithm could not be met. Therefore, a simplified approach was applied to evaluate the similarity in the emission profiles, using two distance metrics: 1) cosine distance (Eq. S1), and 2) Euclidean distance (Eq. S2):

$$d_1 = 1 - \frac{u \cdot v}{||u||_2 ||v||_2} \quad (S1)$$

$$d_2 = ||u - v||_2 = \left( \sum_{j=1}^n |u_j - v_j|^2 \right)^{1/2} \quad (S2)$$

where  $d_1$  and  $d_2$  are the cosine and Euclidean distances, respectively, and  $u$  and  $v$  are vectors that represent fuel types using their emission profiles. The index  $j$  corresponds to a specific compound in the emissions profile of both  $u$  and  $v$ , and  $n$  is the total number of compounds in the emission profiles of  $u$  and  $v$ .

Before the calculation of either distance metric, the emission profiles of all samples were normalized using the total NMOC EF for each fuel. Normalization was necessary because Euclidean distance is sensitive to magnitude. Furthermore because Eqs. 1 and 2 cannot be applied with missing values (in this data set, values below background), the compounds were filtered and missing values were replaced. Compounds were filtered using two different thresholds, missing in three or more samples and missing in four or more samples. Compounds that exceeded the thresholds were removed from further analysis. For the remaining compounds any missing values were replaced with zeros. Using a threshold of three yielded 137 compounds out of 458, and using a threshold of four yielded 337 out of 458. After normalizing and filtering, the cosine and Euclidean distances were calculated pairwise for all fuel types. The results for both thresholds are shown in Fig. S1 as heatmaps.

From S1 it can be seen that the two conifers (black spruce and ponderosa pine) have the smallest pairwise distances (cosine and Euclidean) and show the greatest similarity. For the rest of the fuels the average distances were 0.2-0.3 (cosine) and 0.1 (Euclidean); and the maximum distances were 0.6 (cosine) and 0.25 (Euclidean). The implication of these results are that the distance methods, applied to the FLAME-4 FL 12 NMOC profiles, can be used to differentiate some of the fuel types (i.e., peat from grasses, grasses from conifers), but they can not be used to differentiate the two conifers. Given that conifers are a dominant fuel type in the western US and that Hatch et al. (2019) showed that monoterpenoids were strongly correlated with conifers, the PR algorithm was developed and applied to differentiate coniferous fuels using monoterpenoids measured during the FLAME-4 FL 12 and FIREX FL16 campaigns.

[a]

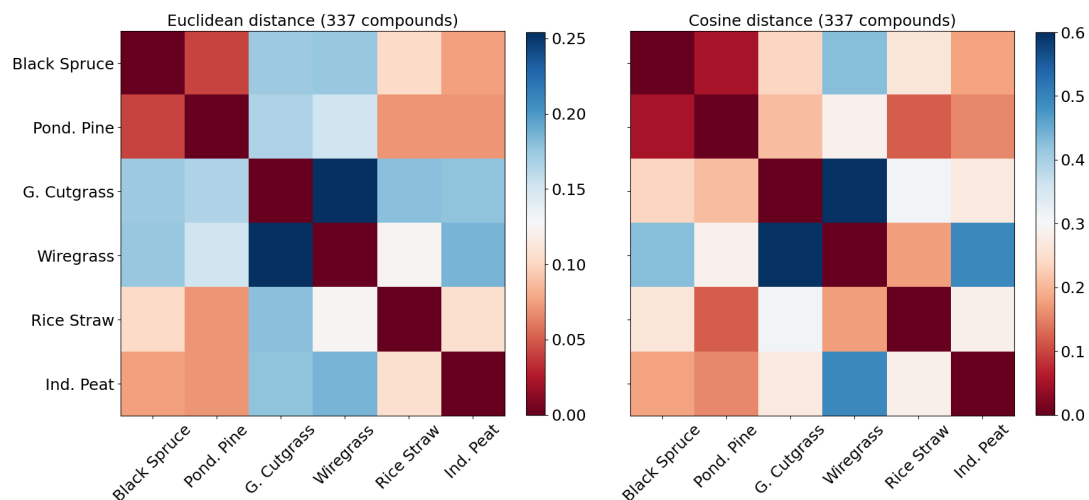

[b]

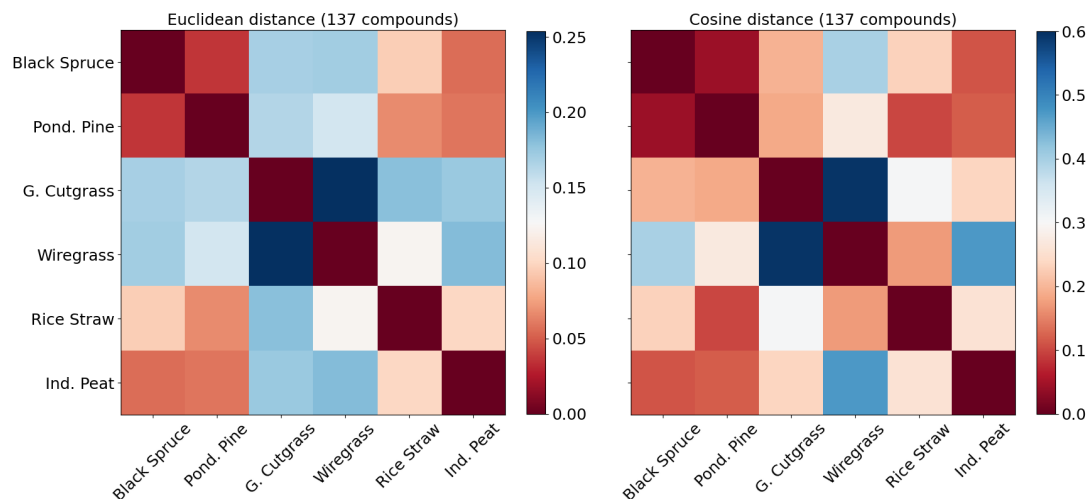

**S 1.** The Euclidean and cosine distances for the FLAME-4 FL12 samples, using a threshold of three or more compounds [a] and four or more compounds [b].

S2 Analysis of variance (ANOVA) technical details

35 In this work, ANOVA (King (2010)) was used for feature selection. ANOVA is a statistical test used to analyze the difference between the means of more than two groups for variable(s) of interest. The null hypothesis ( $H_o$ ) of ANOVA is that there is no difference among group means. The alternative hypothesis ( $H_a$ ) is that the mean of the dependent variable for at least one group differs significantly from the other mean(s). ANOVA uses the  $F$ -test for statistical significance. This allows for comparison of multiple groups at one time, because the error is calculated for the set of means rather than for each pair as is done with a  $t$ -test. The  $F$ -test compares the variance in each group mean from the overall group variance. If the variance within groups is smaller than the variance between groups, the  $F$ -test will find a higher  $F$ -ratio, defined as (Eq. S3):

40 
$$F_{ratio} = \frac{V_b}{V_w} \quad (S3)$$

where  $V_b$  is the mean sum of squares between groups/classes and  $V_w$  is the sum of squares within the same group/class. A higher  $F$ -ratio indicates a higher likelihood that the observed difference is real and not random. Table 1 shows the formulas for the calculation of the  $F$ -ratio, in which  $k$  and  $l$  correspond to the number of classes and samples in each class, respectively, and  $\bar{X}$  and  $\bar{X}_j$  are the overall average of the samples for a specific compound and average of a compound for a specific class.

Table 1. Formulas for ANOVA

| Variance Source | Sum of Squares                                      | Degrees of Freedom | Mean Squares             |
|-----------------|-----------------------------------------------------|--------------------|--------------------------|
| Within          | $SSW = \sum_{j=1}^k \sum_{i=1}^l (X - \bar{X}_j)^2$ | $df_w = k - 1$     | $V_b = \frac{SSW}{df_w}$ |
| Between         | $SSB = \sum_{j=1}^k (\bar{X}_j - \bar{X})^2$        | $df_b = n - k$     | $V_w = \frac{SSB}{df_b}$ |
| Total           | $SST = \sum_{j=1}^n (\bar{X}_j - \bar{X})^2$        | $df_t = n - 1$     |                          |

### 45 S3 Principal component analysis (PCA) with singular value decomposition (SVD)

The first step of PCA with SVD involves the decomposition of the data matrix. The matrix notation for SVD is given by Eq. S4:

$$\mathbf{X} = \mathbf{U} \mathbf{S} \mathbf{V}^T \quad (\text{S4})$$

50 where  $\mathbf{X}$  is the original ( $n \times d$ ) data matrix,  $\mathbf{U}$  ( $n \times r$ ) is the matrix of left singular vectors,  $\mathbf{S}$  ( $r \times r$ ) is a diagonal matrix of singular values for  $\mathbf{X}$ , and  $\mathbf{V}$  ( $r \times d$ ) is the matrix of right singular vectors that correspond to the new principal directions, and  $r$  is the rank of matrix  $\mathbf{X}$ . The principal component scores which are the projection of  $\mathbf{X}$  to a lower dimensional space are given by Eq. S5:

$$\text{scores(PCs)} = \mathbf{X} \mathbf{V} = \mathbf{U} \mathbf{S} \mathbf{V}^T \mathbf{V} = \mathbf{U} \mathbf{S} \quad (\text{S5})$$

Equation S5 in a reduced format gives:

$$50 \quad PC_i = \mathbf{X} * \mathbf{u}_i = ((x_i - \mu)u_i, \dots, (x_n - \mu)^T u_i)^T \quad (\text{S6})$$

where  $x_i, \dots, x_n$  are the original features. Finally the reduced dimensionality is achieved by using an appropriate number of PCs ( $m < d$ ) to represent the projected data. The selection of components is based on the minimization of the reconstruction error (Eq. S7), calculated by:

$$\text{error} = \min |\mathbf{X}_{\text{original}} - \mathbf{X}_{\text{reconstructed}}| \quad (\text{S7})$$

60 The error is a measure of how much information was lost during the dimensionality reduction using fewer components than the number of dimensions to reconstruct the original data matrix. Because the calculation of the error might be computationally expensive, especially for large matrices, there is another metric which is related to the reconstruction error and is much easier to calculate. That metric is called the explained variance ratio (Jolliffe (2002)) and is equal to (Eq. S8):

$$EV\% = \frac{\sum_{i=1}^k \lambda_i}{\sum_{i=1}^p \lambda_i} * 100 \quad (\text{S8})$$

65 where  $k$  is the number of retained components,  $p$  is the number of original variables,  $\lambda$  are the eigenvalues of the decomposition that are obtained by Eq. S9:

$$\Lambda = \frac{\mathbf{S}^2}{(n-1)} \quad (\text{S9})$$

or in reduced format (Eq. S10):

$$\lambda = \frac{s_i^2}{(n-1)} \quad (10)$$

70 where  $s$  are the singular values of the SVD decomposition and  $n$  the number of samples in the data set.

#### S4 Transformations for linear discriminant analysis (LDA)

The LDA algorithm uses the PCA scores from the PR algorithm for training. The PC scores were calculated using the original data matrix after standardization (Lever et al. (2017)). Therefore samples that will be classified and were not part of the training set need to be standardized and then transformed to their representation in the PCA space. Standardization is the process of mean centering and division by the average and standard deviation of each selected compound across all samples, calculated by Eq. S11:

$$\text{compound}_i = \frac{\text{ER}_i - \mu_{\text{training}}}{\sigma_{\text{training}}} \quad (S11)$$

where  $\text{ER}_i$  is the emission ratio of the compound to be standardized, and  $\mu_{\text{training}}$  and  $\sigma_{\text{training}}$  are the average and standard deviation for the same compound obtained from the training set. In this application, the averages and standard deviations were obtained using the training set samples so that the new samples were projected to the same PCA space as the training samples.

#### S5 Classification using LDA

The probability for class assignment, for more than two classes, in LDA is given by  $P(Y = n | X = x)$  (Eq. S12):

$$P(Y = n | X = x) = \frac{\pi_n f_n(x)}{\sum_{l=1}^N \pi_l f_l(x)} \quad (S12)$$

where  $n$  is the class number,  $x$  the sample to be classified and  $l$  denotes the  $l$ th class.  $\pi_k$  is the fraction of the training observations that belong to the  $n$ th class and  $f_n(X)$  is the probability density function. In this case  $f_n(X)$  is assumed to be a multivariate Gaussian distribution (Eq. S13):

$$f_n(x) = -\frac{1}{(2\pi)^{p/2} |\Sigma|^{1/2}} \exp\left(-\frac{1}{2}(x - \mu)^T \Sigma^{-1} (x - \mu)\right) \quad (S13)$$

where  $\mu$  is the vector of the means for each class based on the selected features,  $\Sigma$  is the common covariance matrix for the classes in the training set and  $p$  is the number of features. Substituting Eq. S13 into Eq. S12 and taking the natural logarithm of each side yields:

$$\log P(y = n | x) = -\frac{1}{2}(x - \mu_n)^t \Sigma^{-1} (x - \mu_n) + \log P(y = n) + C_{st} \quad (S14)$$

where  $C_{st}$  is a term that includes constants from the multivariate Gaussian distribution (Eq. S13).

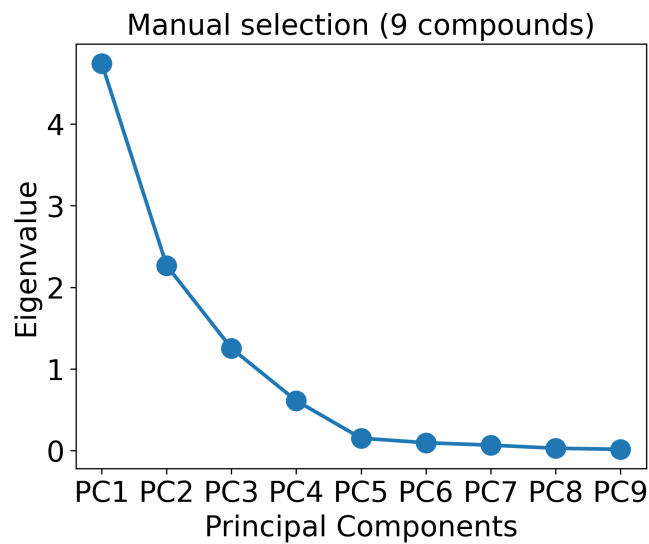

S 2. Eigenvalues from PCA runs for the manual selection of nine compounds versus the number of principal components.

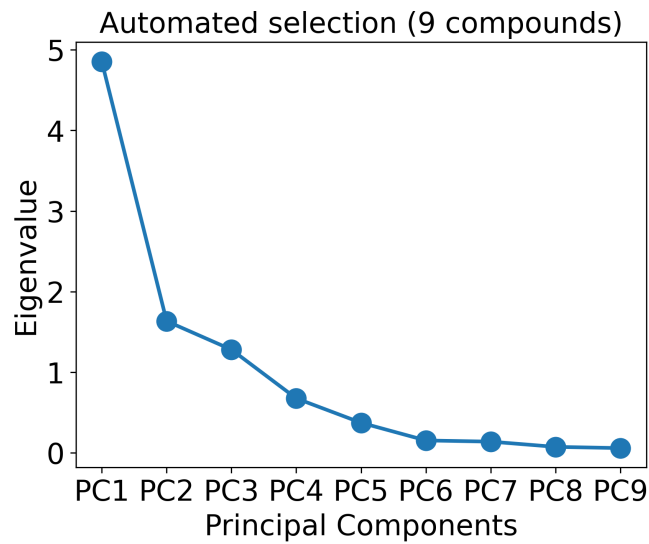

S 3. Eigenvalues from PCA runs for the automated selection of nine compounds versus the number of principal components.

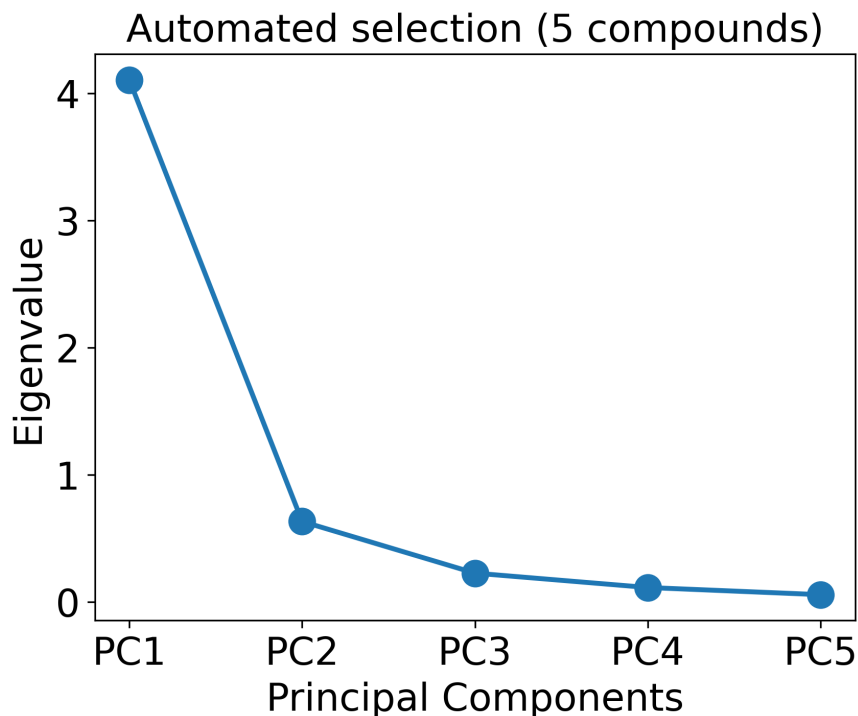

**S 4.** Eigenvalues from PCA runs for automated selection for five compounds versus the number of principal components.

The PR algorithm was run twice; once for five compounds (optimal run case) and once for nine compounds (manuscript section 3.2.1). The effectiveness of dimensionality reduction was compared for the two runs and with manual selection of compounds. In the main manuscript, the quality of feature selection was compared for the three selection methods (automated 9 compounds, automated 5 compounds, and manual) using three different metrics to evaluate the separation. Here the effectiveness of the two automated selection methods is further evaluated by comparing the number of necessary components relative to the initial dimensions to achieve the 80% variance threshold. The selection of five compounds required about 20% - 40% of the number of original dimensions for an effective dimensionality reduction. The additional four selected compounds, for the nine compounds run, required about 44% - 55% of the number of original dimensions. This shows that the solutions for nine compounds require about half the number of original dimensions compared to the five compound solution.

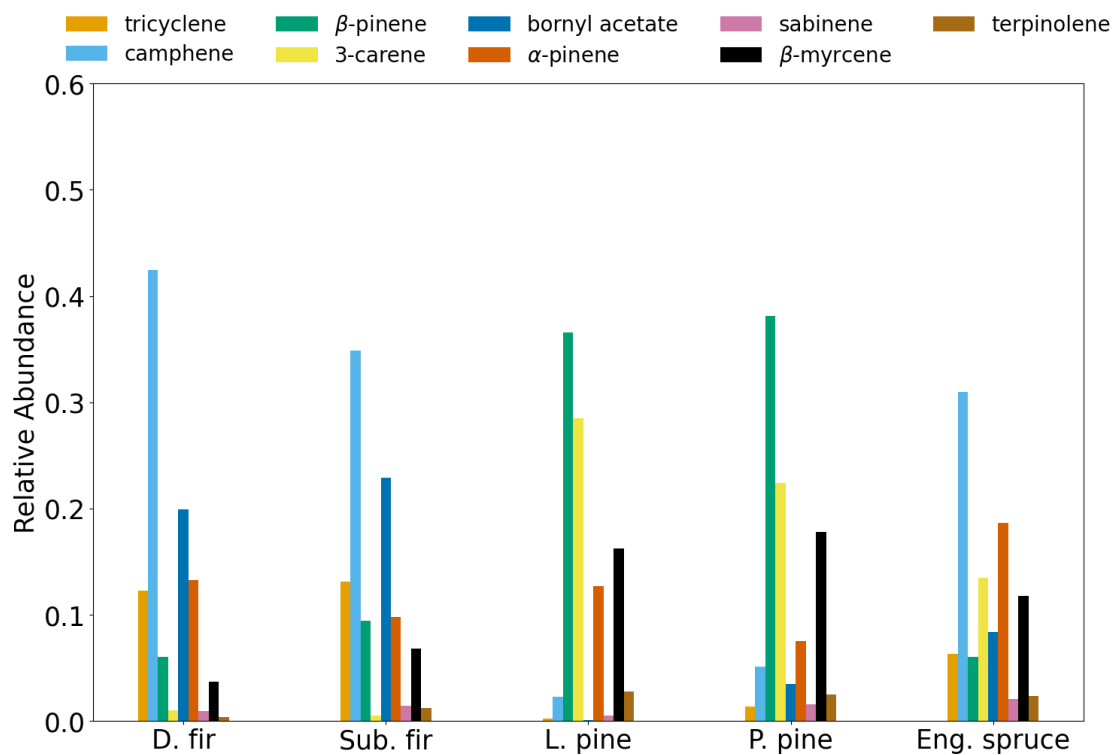

S 5. Normalized emission ratio profiles for nine selected compounds for pines, firs and spruce.

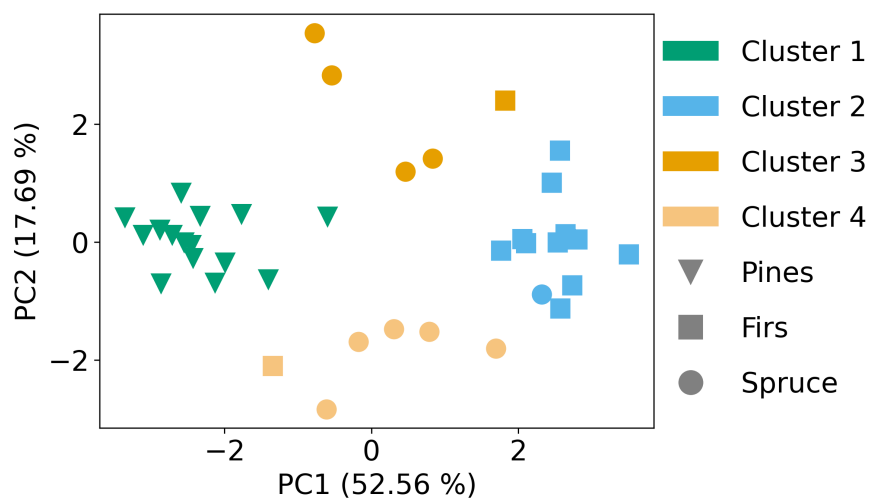

S 6. PCA coupled with k-means clustering results for nine selected compounds for the PC1 and PC2 pair.



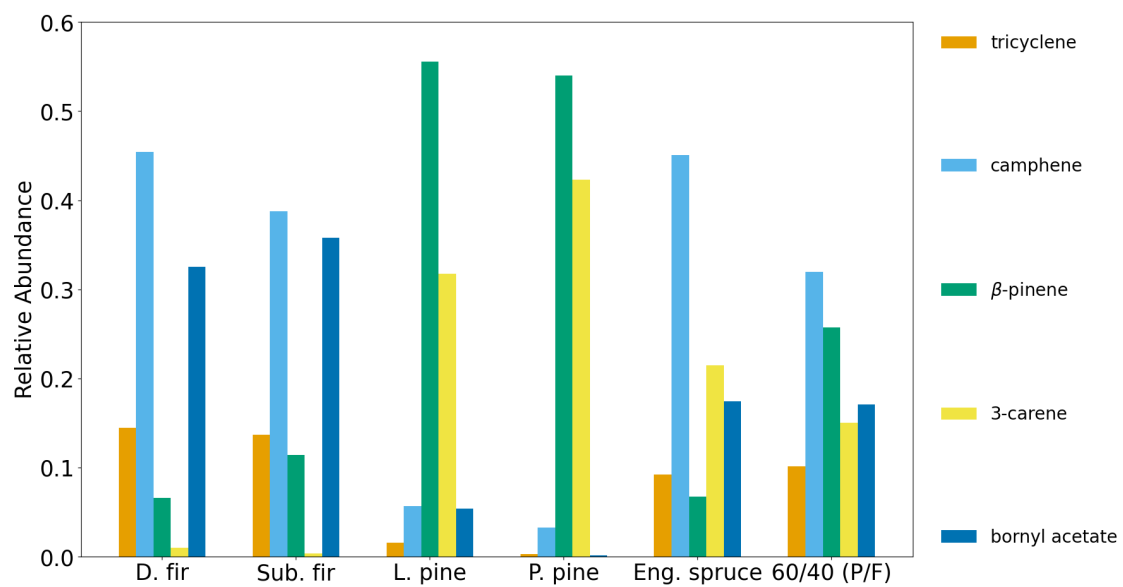

**S 7.** Normalized emission ratio profiles for five selected compounds for pines, firs, spruce and the synthetic 60/40 pine/fir sample.

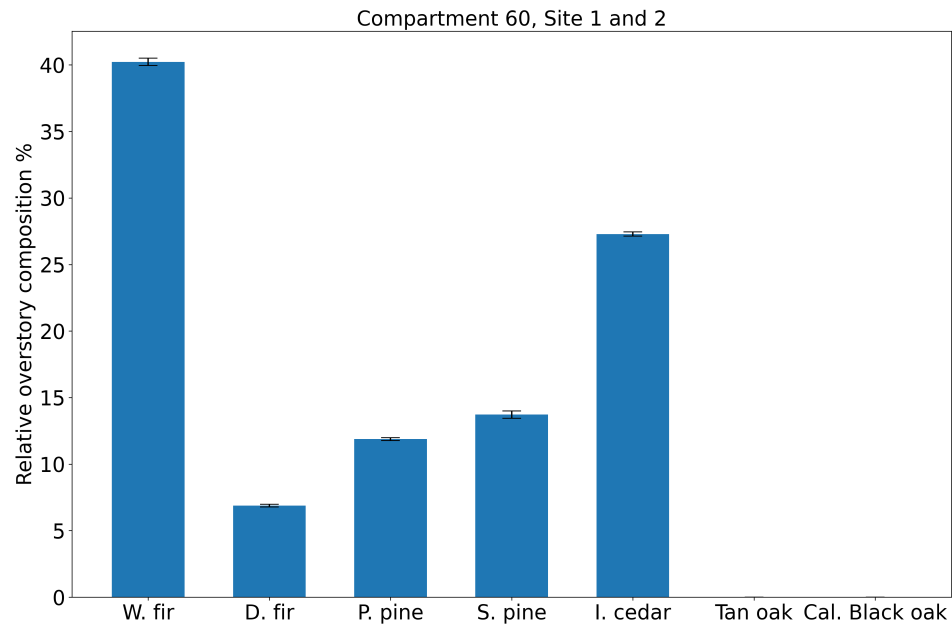

**S 8.** Average relative fractional composition for compartment 60 (burned on 31 October 2017) close to site 1 and 2. The fractional contribution of each species was determined by the proportion of basal area among all trees with diameter >11.4 cm at breast height. Data for the overstory composition were taken from the supplemental material in Hatch et al. (2019)

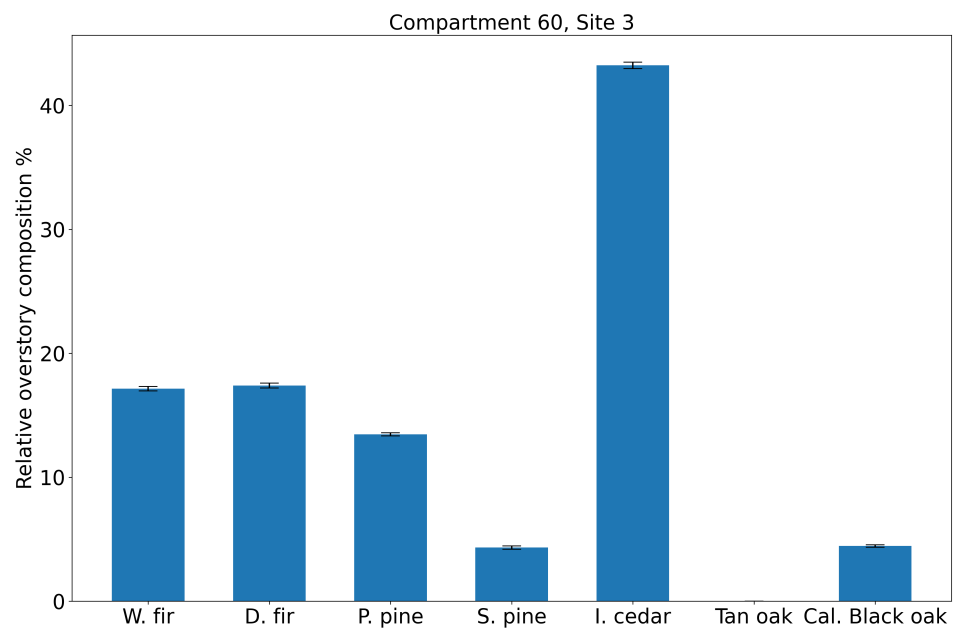

**S 9.** As in S8 but for compartment 60 (burned on 31 October 2017) site 3.

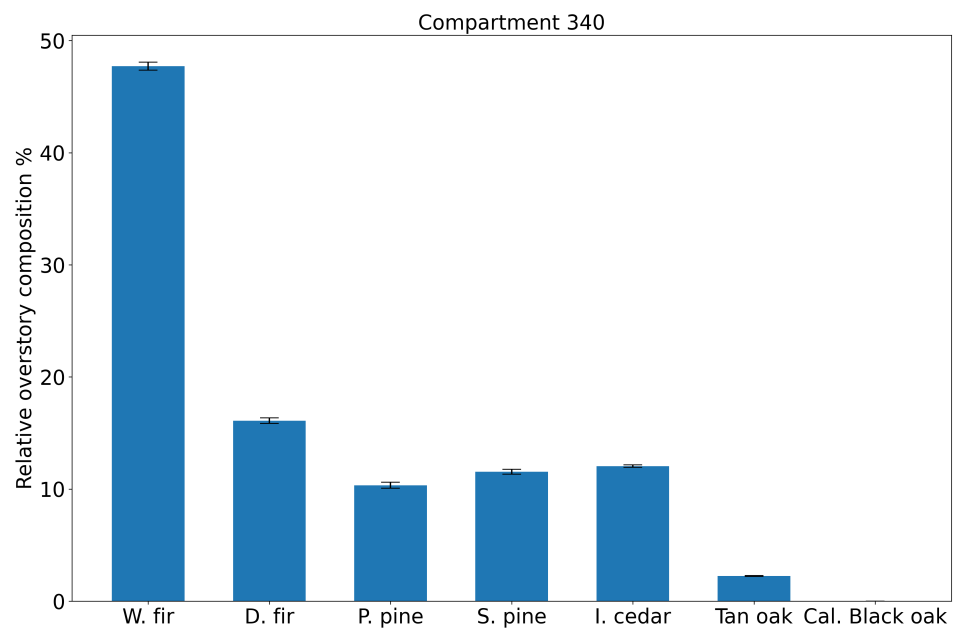

**S 10.** As in S8 but for compartment 340 (burned on 30 October 2017) site 2.

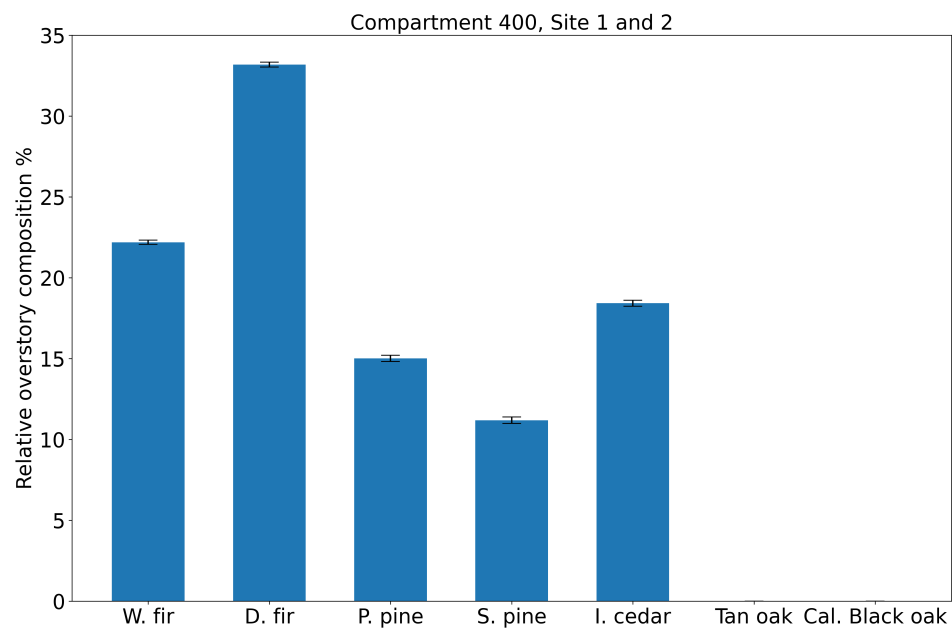

**S 11.** As in S8, for compartiment 400 (burned on 01 November 2017) for sites 1 and 2.

**Table 2.** Sample number, fuel types and emission ratios (ppb/ppb) for retained compounds after preprocessing (*continues on the next page*)

| Sample no. | Fuel type        | tricyclene | a-pinene | camphene | sabinene | b-pinene | b-myrcene |
|------------|------------------|------------|----------|----------|----------|----------|-----------|
| Burn 10    | Douglas fir      | 0.00992    | 0.01092  | 0.04101  | 0.00308  | 0.00195  | 0.00219   |
| Burn 11    | Douglas fir      | 0.02357    | 0.02191  | 0.06427  | 0.00021  | 0.00848  | 0.00718   |
| Burn 14    | Douglas fir      | 0.01275    | 0.01756  | 0.06219  | 0        | 0.00661  | 0.00463   |
| Burn 18    | Douglas fir      | 0.03135    | 0.02425  | 0.11072  | 0.0003   | 0.01249  | 0.00854   |
| Burn 22    | Douglas fir      | 0.00017    | 0.00309  | 0.00096  | 0        | 0.01097  | 0.00203   |
| Burn 45    | Douglas fir      | 0.04538    | 0.05038  | 0.13323  | 0.0046   | 0.02133  | 0.01323   |
| Burn 57    | Douglas fir      | 0.0097     | 0.0151   | 0.04669  | 0.00163  | 0.00351  | 0.00252   |
| Burn 64    | Douglas fir      | 0.02979    | 0.02479  | 0.04825  | 0.01182  | 0.01022  | 0.00932   |
| Burn 08    | Engelmann spruce | 0.00051    | 0        | 0.00145  | 0        | 0        | 0.0013    |
| Burn 09    | Engelmann spruce | 0.00057    | 0        | 0.00156  | 0        | 0.00205  | 0.00205   |
| Burn 12    | Engelmann spruce | 0.00072    | 0.001    | 0.00136  | 0.00029  | 0.00058  | 0.00047   |
| Burn 17    | Engelmann spruce | 0.0169     | 0.0465   | 0.09012  | 0.00625  | 0.00557  | 0.02764   |
| Burn 25    | Engelmann spruce | 0          | 0.00345  | 0.003    | 0        | 0.00514  | 0.00258   |
| Burn 26    | Engelmann spruce | 0.00036    | 0        | 0.00092  | 0        | 0        | 0.00016   |
| Burn 36    | Engelmann spruce | 0.00069    | 0.00262  | 0.00125  | 0.0004   | 0.0021   | 0.00046   |
| Burn 44    | Engelmann spruce | 0.00109    | 0.0034   | 0.00292  | 0        | 0.00147  | 0.00131   |
| Burn 52    | Engelmann spruce | 0.00025    | 0.00454  | 0.00057  | 0.00011  | 0.0026   | 0.00188   |
| Burn 54    | Engelmann spruce | 0.00044    | 0.00227  | 0.0029   | 0.00011  | 0.00104  | 0.00234   |
| Burn 05    | Lodgepole pine   | 0          | 0        | 0        | 0.00025  | 0.00842  | 0.00276   |
| Burn 07    | Lodgepole pine   | 0.00029    | 0.0068   | 0.00109  | 0.00049  | 0.01236  | 0.00785   |
| Burn 20    | Lodgepole pine   | 0          | 0.00041  | 0.00025  | 0.00015  | 0.01054  | 0.00363   |
| Burn 40    | Lodgepole pine   | 0.00078    | 0.00508  | 0.00173  | 0.00131  | 0.02675  | 0.01456   |
| Burn 42    | Lodgepole pine   | 0.00161    | 0.00357  | 0.00782  | 0.00088  | 0.01889  | 0.00692   |
| Burn 58    | Lodgepole pine   | 0.00014    | 0.00139  | 0        | 0.00037  | 0.00665  | 0.00299   |
| Burn 63    | Lodgepole pine   | 0.00063    | 0.00202  | 0.0021   | 0.0006   | 0.01356  | 0.00666   |
| Burn 03    | Ponderosa pine   | 0          | 0.00685  | 0.00072  | 0.00046  | 0.03033  | 0.00965   |
| Burn 04    | Ponderosa pine   | 0          | 0.00295  | 0.00058  | 0.00029  | 0.01187  | 0.00832   |
| Burn 16    | Ponderosa pine   | 0.00045    | 0.00754  | 0.00257  | 0.00015  | 0.01157  | 0.00601   |
| Burn 19    | Ponderosa pine   | 0          | 0.00211  | 0        | 0.00038  | 0.02297  | 0.01013   |
| Burn 37    | Ponderosa pine   | 0.00027    | 0.01244  | 0.00171  | 0.0006   | 0.02439  | 0.01592   |
| Burn 39    | Ponderosa pine   | 0.00051    | 0.02943  | 0.00569  | 0.00126  | 0.08736  | 0.03142   |
| Burn 59    | Ponderosa pine   | 0.00018    | 0.01183  | 0.00228  | 0.00057  | 0.02012  | 0.01994   |
| Burn 72    | Ponderosa pine   | 0.00033    | 0.01879  | 0.00311  | VALUE!   | 0.05579  | 0.01587   |
| Burn 15    | Subalpine fir    | 0.03068    | 0.02024  | 0.07088  | 0.00053  | 0.02839  | 0.03026   |
| Burn 23    | Subalpine fir    | 0.00321    | 0.00085  | 0.01438  | 0        | 0.00369  | 0.00159   |
| Burn 51    | Subalpine fir    | 0.0203     | 0.01045  | 0.0715   | 0        | 0.00521  | 0.00066   |
| Burn 56    | Subalpine fir    | 0.00194    | 0.00523  | 0.0104   | 0        | 0.00226  | 0.00088   |
| Burn 67    | Subalpine fir    | 0.00968    | 0.00753  | 0.03566  | 0.00029  | 0.01159  | 0.00323   |
| Burn 47    | Subalpine fir    | 0.02292    | 0.01978  | 0.06436  | 0.00049  | 0.02384  | 0.01552   |

| Sample no. | Fuel type        | MT isomer | 3-carene | p-cymene | D-Limonene | terpinolene | bornyl acetate |
|------------|------------------|-----------|----------|----------|------------|-------------|----------------|
| Burn 10    | Douglas fir      | 0         | 0.00037  | 0.00199  | 0.01467    | 0.00082     | 0.01658        |
| Burn 11    | Douglas fir      | 0.00084   | 0.00075  | 0.00344  | 0.03394    | 0.00101     | 0.03628        |
| Burn 14    | Douglas fir      | 0.0005    | 0.00399  | 0.00194  | 0.02414    | 0.00074     | 0.03925        |
| Burn 18    | Douglas fir      | 0.00081   | 0        | 0.0024   | 0.03966    | 0.00103     | 0.043          |
| Burn 22    | Douglas fir      | 0.00024   | 0.00217  | 0.00169  | 0.0041     | 0           | 0              |
| Burn 45    | Douglas fir      | 0.00145   | 0.00129  | 0.00585  | 0.04843    | 0           | 0.05537        |
| Burn 57    | Douglas fir      | 0.00027   | 0.00244  | 0.00157  | 0.01411    | 0.00075     | 0.02472        |
| Burn 64    | Douglas fir      | 0.00114   | 0.00182  | 0.00519  | 0.0351     | 0.00611     | 0.04345        |
| Burn 08    | Engelmann spruce | 0         | 0        | 0.00168  | 0.00122    | 0           | 0.00132        |
| Burn 09    | Engelmann spruce | 0         | 0.00046  | 0.0023   | 0.00169    | 0           | 0.00101        |
| Burn 12    | Engelmann spruce | 0.00388   | 0.00401  | 0.00654  | 0.0014     | 0.00056     | 0.00017        |
| Burn 17    | Engelmann spruce | 0.00136   | 0.0377   | 0.00666  | 0.1423     | 0.00634     | 0.02395        |
| Burn 25    | Engelmann spruce | 0         | 0        | 0.0007   | 0.00086    | 0           | 0              |
| Burn 26    | Engelmann spruce | 0.00413   | 0.00365  | 0.00984  | 0.00322    | 0.00076     | 0              |
| Burn 36    | Engelmann spruce | 0         | 0        | 0.0049   | 0.00494    | 0.00032     | 0.00049        |
| Burn 44    | Engelmann spruce | 0         | 0        | 0.00096  | 0.00266    | 0           | 0.00079        |
| Burn 52    | Engelmann spruce | 0.00016   | 0.00027  | 0.00145  | 0.00259    | 0           | 0.00058        |
| Burn 54    | Engelmann spruce | 0.00018   | 0        | 0.00275  | 0.00304    | 0           | 0.00032        |
| Burn 05    | Lodgepole pine   | 0.00044   | 0.00435  | 0.00154  | 0.00202    | 0.00044     | 0              |
| Burn 07    | Lodgepole pine   | 0.00109   | 0.00571  | 0.00287  | 0.00908    | 0.00074     | 0.00032        |
| Burn 20    | Lodgepole pine   | 0.00063   | 0.00131  | 0.00114  | 0.00157    | 0.00036     | 0              |
| Burn 40    | Lodgepole pine   | 0.00252   | 0.02214  | 0.00634  | 0.01234    | 0.0021      | 0.00066        |
| Burn 42    | Lodgepole pine   | 0.0009    | 0.00838  | 0.00368  | 0.01118    | 0.00102     | 0.00628        |
| Burn 58    | Lodgepole pine   | 0.00055   | 0.00781  | 0.00258  | 0.00467    | 0.00067     | 0.00034        |
| Burn 63    | Lodgepole pine   | 0.0009    | 0.00743  | 0.00417  | 0.01474    | 0.00109     | 0.00136        |
| Burn 03    | Ponderosa pine   | 0.00099   | 0.03552  | 0.00251  | 0.01071    | 0.00187     | 0              |
| Burn 04    | Ponderosa pine   | 0.00132   | 0.0188   | 0.00218  | 0.00961    | 0.00125     | 0              |
| Burn 16    | Ponderosa pine   | 0.001     | 0.00862  | 0.0062   | 0.0164     | 0.00042     | 0.0005         |
| Burn 19    | Ponderosa pine   | 0.00139   | 0.02758  | 0.00389  | 0.00851    | 0.00141     | 0              |
| Burn 37    | Ponderosa pine   | 0.00189   | 0.02063  | 0.00397  | 0.01733    | 0.0018      | 0              |
| Burn 39    | Ponderosa pine   | 0.00558   | 0.04626  | 0.00725  | 0.04677    | 0.00753     | 0              |
| Burn 59    | Ponderosa pine   | 0.00214   | 0.02791  | 0.00333  | 0.02039    | 0.00266     | 0              |
| Burn 72    | Ponderosa pine   | 0.00199   | 0.0209   | 0.00441  | 0.02076    | 0.0031      | 0.00027        |
| Burn 15    | Subalpine fir    | 0.00576   | 0.00101  | 0.00533  | 0.02981    | 0.00253     | 0.05803        |
| Burn 23    | Subalpine fir    | 0         | 0        | 0.00057  | 0.00543    | 0           | 0.01054        |
| Burn 51    | Subalpine fir    | 0         | 0        | 0.00305  | 0.02098    | 0           | 0.0184         |
| Burn 56    | Subalpine fir    | 0.00119   | 0        | 0.00712  | 0.00658    | 0           | 0.00375        |
| Burn 67    | Subalpine fir    | 0.00052   | 0.00136  | 0.00262  | 0.01375    | 0.00029     | 0.01083        |
| Burn 47    | Subalpine fir    | 0.00198   | 0.00022  | 0.00568  | 0.03509    | 0.00194     | 0.06205        |

## References

- 105 Hatch, L. E., Luo, W., Pankow, J. F., Yokelson, R. J., Stockwell, C. E., and Barsanti, K. C.: Identification and quantification of gaseous organic compounds emitted from biomass burning using two-dimensional gas chromatography–time-of-flight mass spectrometry, *Atmos. Chem. Phys.*, 15, 1865–1899, <https://doi.org/10.5194/acp-15-1865-2015>, 2015.
- Hatch, L. E., Jen, C. N., Kreisberg, N. M., Selimovic, V., Yokelson, R. J., Stamatis, C., York, R. A., Foster, D., Stephens, S. L., Goldstein, A. H., and Barsanti, K. C.: Highly Speciated Measurements of Terpenoids Emitted from Laboratory and Mixed-Conifer Forest Prescribed  
110 Fires, *Environmental Science & Technology*, 53, 9418–9428, <https://doi.org/10.1021/acs.est.9b02612>, pMID: 31318536, 2019.
- Jolliffe, I.: *Principal Component Analysis*, Springer, 2002.
- King, B. M.: *Analysis of Variance*, pp. 32–36, Elsevier, Oxford, <https://www.sciencedirect.com/science/article/pii/B9780080448947013063>, 2010.
- Lever, J., Krzywinski, M., and Altman, N.: Principal component analysis, *Nature Methods*, 14, 641–642, <https://doi.org/10.1038/nmeth.4346>,  
115 2017.
