# Supplementary material for: Development and application of a supervised pattern recognition algorithm for identification of fuel-specific emissions profiles
Source: Copernicus journal article supplement (doi:10.5194/amt-15-2591-2022), 2022-04-29
Supplement: Supplementary file 2 [file amt-15-2591-2022-supplement.zip]

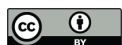

## *Supplement of*

# **Development and application of a supervised pattern recognition algorithm for identification of fuel-specific emissions profiles**

**Christos Stamatis and Kelley Claire Barsanti**

*Correspondence to:* Kelley Claire Barsanti ([kbarsanti@engr.ucr.edu](mailto:kbarsanti@engr.ucr.edu))

- [amt-15-2591-2022-supplement-title-page.pdf](#)
- [amt-2021-304-supplement.pdf](#)
- [data.ods](#)

The copyright of individual parts of the supplement might differ from the article licence.
